# Supplementary material for: Environmental Enteric Dysfunction Is Associated With Poor Linear Growth and Can Be Identified by Host Fecal mRNAs
Source: PubMed Central journal article supplement (PMC5084633; doi:10.1097/mpg.0000000000001315), 2016-10-24
Supplement: jpga-63-453-s001.pdf [file jpga-63-453-s001.pdf]

**SUPPLEMENTARY FIGURE 1.** Comparison of the measurements of lactulose (%L) and mannitol (%M) using two methods of analysis: HPLC (high performance liquid chromatography) and LC-MSMS (liquid chromatography-tandem mass spectrometry).

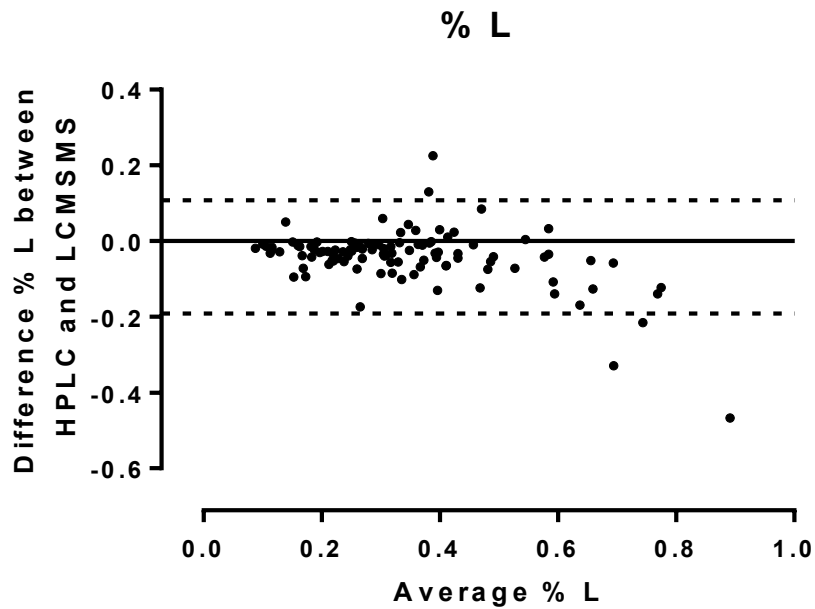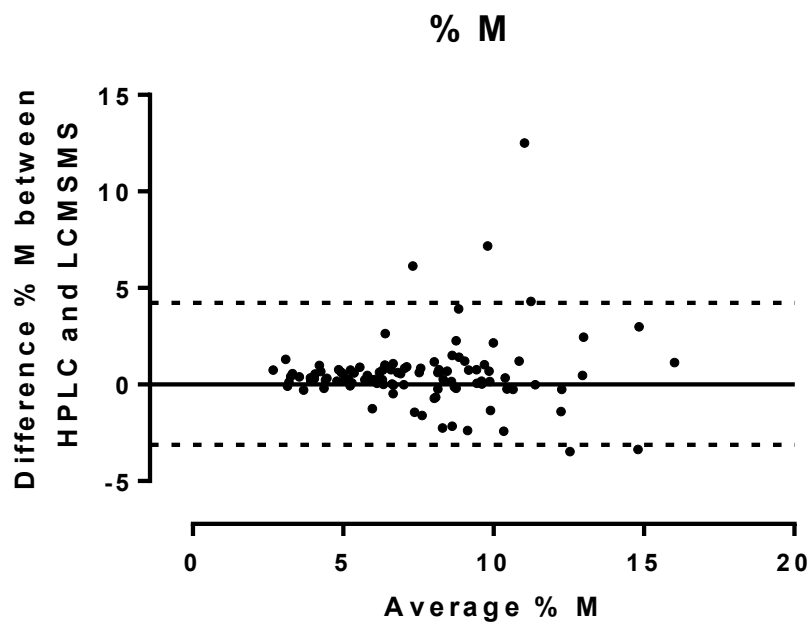

Bland-Altman plots show the differences in %L and %M, the solid horizontal line represents the mean and the dashed lines the 95% confidence interval, referred as the limits of agreement.
